# Supplementary material for: 絵本とその読み聞かせの「心地よさ」に関する考察 : 絵本『はじめまして』の分析を中心に(自由研究発表)
Source: HighWire-hosted journal article supplement (doi:10.1136/bmj.g7620), 2012-05-26
Supplement: bmj.g7620.pdf [file bmj.g7620.pdf]

# 实力新手

## 成年住院患者的静脉补液治疗

Competent novice

### Intravenous fluid therapy in adult inpatients

来源:BMJ 2014;350:g7620 doi: 10.1136/bmj.g7620

静脉液体管理是常见的医疗工作之一,能够下达安全准确的补液医嘱是初级医生培训必须达到的目标<sup>1</sup>。即便如此,临床上补液错误并不少见,这与培训不当和知识有误有关<sup>2</sup>。不合理补液会带来严重的并发症,如补液过多造成肺水肿和严重低钠血症,补液不足造成急性肾损伤等<sup>2-3</sup>。

#### 如何做到最好

关于如何进行静脉液体管理,现尚缺乏来自随机对照研究等高质量的证据<sup>4</sup>。安全的补液处方需要各种相关临床技能的整合,例如如何判断体液平衡状态、了解正常或病理环境下体液的特点、了解常用液体的特性及作用。

#### 正常体液平衡

水大约占据男性体重的60%、女性体重的55%(女性脂肪含量稍高)。尽管水在人体内不

#### 你需要知道

体液平衡通常可以结合病史(摄入量、丢失量、所患疾病、治疗方案)、体格检查(皮肤、神经系统、心肺、腹部)和实验室检查结果(尿素、电解质、肌酐、乳酸、红细胞压积)判断。

遵循5R原则可以帮助初级医师更简便的制定补液方案:复苏(Resuscitation),常规维持(Routine maintenance)、再分布(Redistribution)、替换丢失(Replacement)和再评估(Reassessment)。

对于复杂的病例,如继发于肾、肝、心功能不全时,需要高级医师评估,甚至有创血流动力学监测。

Paul Frost  
consultant in intensive  
care medicine;  
clinical senior  
lecturer<sup>1,2</sup>

<sup>1</sup>Critical Care  
Directorate,  
University Hospital of  
Wales, Cardiff CF14  
4XW, UK;  
<sup>2</sup>Institute of Medical  
Education, School of  
Medicine, Cardiff  
University, Cardiff  
CF14 4XN

Correspondence to:  
P Frost  
Frostp2@cf.ac.uk

程安琪 译  
李燕明 校  
北京医院  
呼吸与危重症  
医学科

呈均一分布,从概念上可将其划分为细胞内液和细胞外液(图1)。细胞外液主要由毛细血管壁分隔成血浆和组织间液。

## 血浆和组织间液之间的液体交换

毛细血管内皮由糖萼构成,即由一层蛋白聚糖及糖蛋白组成的网将血浆与其他分隔开。经由毛细血管的液体交换由跨内皮压力差及血浆和糖萼外环境的胶体渗透压差决定。就结果而言,大部分液体从血浆中经无窗孔内皮滤出,作为淋巴从间质淋巴管回到循环<sup>5</sup>。

## 组织间液和细胞内液之间的液体交换

主要由渗透压驱动。水平衡在渗透压感受器及压力感受器的作用下,由抗利尿激素-渴觉反馈机制调节。

## 疾病和损伤时的液体平衡

由于机体对应激、炎症、营养不良、医学治疗、器官功能受损的非特异性代谢反应,正常的水电解质平衡(表1)在疾病和损伤时可以被彻底打破。例如:

表1 70 kg男性生理条件下每日水平衡的情况

| 摄入 |       | 排出   |       |
|----|-------|------|-------|
| 来源 | 量(ml) | 丢失部位 | 量(ml) |
| 水  | 1 000 | 尿    | 1 000 |
| 食物 | 650   | 皮肤   | 500   |
| 氧化 | 350   | 肺    | 400   |
|    |       | 粪便   | 100   |
| 总量 | 2 000 | 总量   | 2 000 |

- 应激反应:在该反应的分解阶段会出现钾丢失、水钠潴留、少尿。因此对于手术后的患者,区分少尿是由应激反应造成的(无害)还是急性肾损伤造成的非常重要。
- 炎症状态(如外伤或手术后的脓毒症)及其他医学状况(如糖尿病、高血糖、血容量过多):导致糖萼降解及屏障能力的降低,胶体由血管内漏出至组织间隙,进而使胶体的扩容效应受损,造成组织水肿<sup>5</sup>。
- 营养不良:这会导致水钠负荷过重,并耗尽钾、磷、钙和镁。对于营养不良的患者,静脉补糖可能引发肺水肿和心律失常(复食综合征)<sup>6</sup>。
- 药物治疗:很多药物可破坏水电解质平衡;常见的有襻利尿剂(致低血容量、低钾血症)、糖皮质激素和非甾体抗炎药(致液体潴留)。
- 器官功能障碍:心力衰竭和肝硬化时,神经体液调节导致细胞外液增加、外周水肿、腹水、对静脉补液过量更敏感。神经手术或脑外伤可能损伤下丘脑和垂体,导致抗利尿激素不当分泌综合征(SIADH),并表现为尿崩症,或脑性耗盐综合征。器官衰竭使得补液面临更多挑战。在临床评估的过程中,要注意及时发现血容量不足,必要时请上级医师共同评估。

表1描述了70 kg男性正常情况下每日的液体平衡情况,框图1列出了每日正常需求量。

## 框图1 常规维持需要的液体量

水:每天25~30 ml/kg  
 钠、钾、氯:每天约1 mmol/kg  
 葡萄糖:每天50~100 g

## 体液平衡的临床评估

通常可以根据患者病史、体格检查和实验室检查结果来评估患者的体液状态。关键的病史信息包括液体摄入量(包括肠内及肠外途径)、液体丢失量(如失血量、尿量、胃肠丢失量和不可感丢失量),必要时需要从亲属或看护人员处得知这些信息。也要注意患者评估当时的病况、并发症和补液治疗的情况。注意患者皮肤、神经系统、心肺系统和腹部的体征,详见框图2。将各个系统的提示机体容量的症状、体征结合起来分析,更有助于提高其敏感性和特异性(框图2)。

## 框图2 血容量过多及血容量不足时的症状、体征表现

**血容量过多:**气短、端坐呼吸、发作性夜间呼吸困难、踝水肿、体重增加、外周和腰骶部水肿、腹水、肝肿大、高血压、颈静脉压升高、心尖搏动移位、第三心音、爆裂音和喘鸣音。

**血容量不足:**口渴、呕吐、腹泻、体重减轻、眩晕、意识模糊、嗜睡、皮肤弹性下降、黏膜干燥、眼眶凹陷、毛细血管再充盈减缓、心动过速、体位性低血压、少尿。

## 有时经过仔细临床评估也很难明确体液状态

例如,低血容量可能是由于心力衰竭患者利尿剂应用过量导致。血容量不足还可能与水肿或腹水并存,如肝硬化患者急性出血后、急症如胰腺炎或脓毒性休克的恢复期。这些患者需要上级医师指导评估,甚至在补液前需要在监护病房进行有创血流动力学监测来评估对补液的反应<sup>7</sup>。简单而言,如果给予液体负荷量(15分钟内输入500 ml晶体液)后患者血压上升,心动过速改善,则说明患者处于低血容量状态,当然这些患者仍需要更高级的评估。

## 记录出入量及每日体重变化

这可以帮助判断体液状态,但是注意多尿不能除外低血容量(比如在利尿治疗或有糖尿病酮症酸中毒时),少尿可能是手术后的生理反应(病例分析1)<sup>8</sup>。

## 实验室检查

在脱水状态下,尿素、肌酐、乳酸、红细胞压积、血红蛋白(失血时不适用)会升高,但不能用来确诊。

### 血钠

高钠血症和低钠血症都可以在低血容量时出现,分析低钠血症的原因时需要测量尿渗透压及尿钠值<sup>9</sup>。对于低血容量低钠血症(如继发于腹泻或呕吐时),尿钠应该低于30 mmol/L、尿渗透压应该高于100 mOsm/kg。肾功能不全、使用利尿剂、已进行静脉补液的情况下,尿渗透压和尿钠值不具有参考意义。

### 常见液体的特性

静脉液体可分为胶体液和晶体液。

### 胶体液

胶体分子量较大,通常溶于晶体溶液如等渗盐水中。它们主要可分为两类,半合成物(羟乙基淀粉、明胶、右旋糖酐)

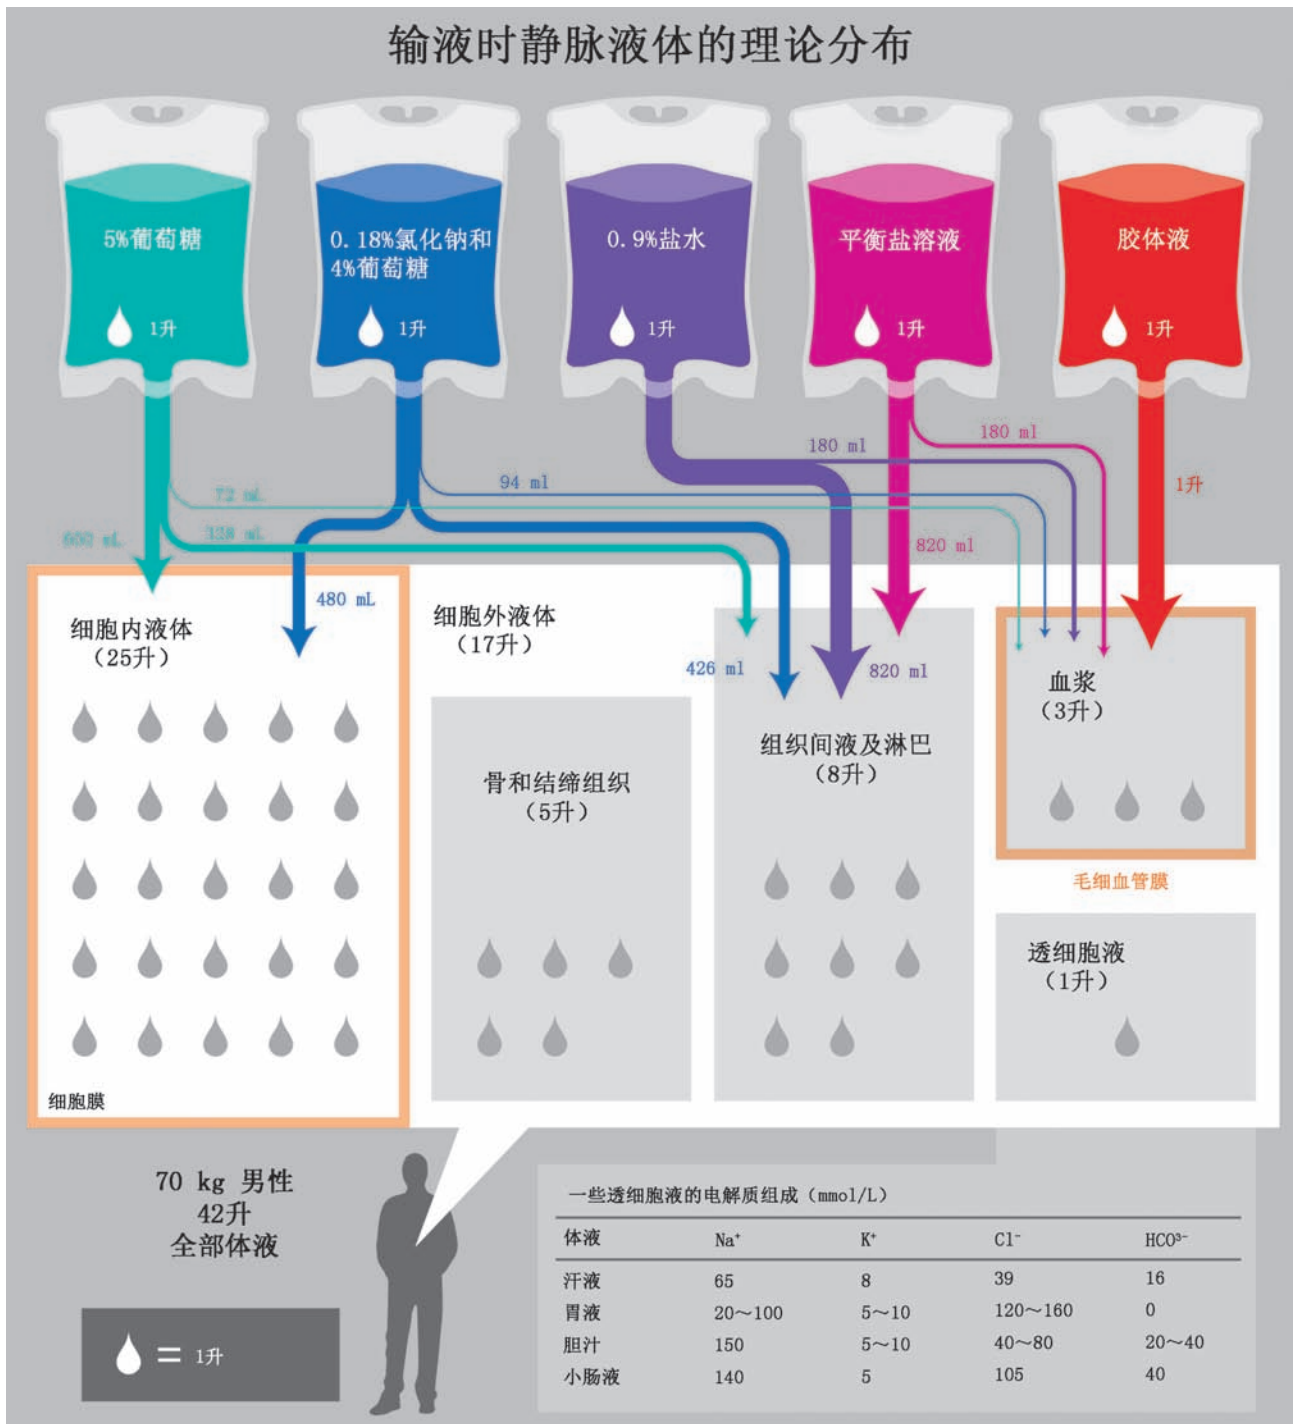

图1 健康人的体液量及输液时静脉液体的理论分布

表2 血浆及常见胶体的组成及胶体渗透压

| 液体     | 钠(mmol/L) | 氯(mmol/L) | 胶体(g/L) | 胶体渗透压(mm/Hg) |
|--------|-----------|-----------|---------|--------------|
| 正常血浆   | 142       | 103       | 35~45   | 25           |
| HES 6% | 154       | 154       | 60      | 36           |
| 琥珀凝胶   | 154       | 120       | 40      | 26~29        |
| 右旋糖酐40 | 154       | 154       | 100     | 168~191      |

注:HES:羟乙基淀粉

和血浆衍生物(如白蛋白)(表2)<sup>10</sup>。胶体无法轻易透过毛细血管膜,这一血管内置留的特性是它们在复苏时被广泛应用的原因(图1)。尽管一些研究表明胶体比晶体在血管内存留更多<sup>11</sup>,实际效果却并不理想,因为急性病程时常有毛细血管漏。而且,半合成胶体价格昂贵,并会带来肾衰竭、凝血障碍、过敏等一系列不良反应。目前而言,很少证据支持半合成胶体用于液体复苏,对于重症患者若使用还可能有害<sup>12</sup>。很多设计良好的临床试验对比羟乙基淀粉和晶体液,结论是羟乙基淀粉会增加患者的病死率和肾脏损害<sup>13-15</sup>。

此外,最近一篇比较胶体、晶体对危重患者复苏效果的Cochrane综述表明,胶体并没有降低患者死亡风险的作用<sup>16</sup>。近日,英国药监局(Medicines and Healthcare Products Regulatory Agency)认为对于所有患者,使用羟乙基淀粉扩容的风险大于获益,将其暂时停用<sup>17</sup>。

在复苏时,人血白蛋白也得到广泛应用;但是,它的价格较贵,也没有证据认为白蛋白相对其他胶体或晶体有优势。最近一项大规模研究显示,对于严重脓毒症的患者,增加白蛋白相较于单用晶体,并没有提高生存率<sup>18</sup>。

### 晶体液

晶体液是指溶有离子(如钠、钾、氯)或糖(如葡萄糖)或者二者皆有的水溶液。0.9%盐水仅含有钠和氯,其他的“平衡”盐溶液,如Hartmann's溶液(表3),则尽量模仿血浆的实际组成。晶体液输注后在体内的实际分布,由渗透压和含钠量决定。平衡盐溶液和0.9%盐水与血浆等渗且含钠量近似,它们主要存在于细胞外液,按比例分布于血浆和组织液中;这是因为细胞膜(与毛细血管内皮不同)对于钠是不可渗透的,等渗液体在细胞内外也没有形成渗透压梯度。与之相反,尽管5%葡萄糖溶液也是等渗的,但它不含钠,葡

### 案例分析1

一位75岁女性,因憩室脓肿行Hartmann手术,手术过程顺利,术后4小时,护士发现过去2小时她的尿量每小时降低到不足0.5 ml/kg,你需要制定补液负荷量并提高Hartmann维持溶液的输注速度。

体格检查并没有血容量不足的体征(框图2)或者腹胀,尿管通畅,你注意到她自手术后体液平衡(出入量)入超4 L。化验结果显示血红蛋白110 g/L(参考值115~160),钠135 mmol/L(133~146),钾4.1 mmol/L(3.5~5.3),尿素6 mmol/L(2.5~7.8),肌酐72 μmol/L(50~110),静脉乳酸1.5 mmol/L(0.5~2.2)。

问题1:下一步你将如何做?

葡萄糖进入体内后很快就会被细胞摄取,所以剩余的纯水分子在细胞内外由渗透压决定实际分布(图1)。以上特点决定了晶体液如何使用——0.9%盐水和平衡盐溶液用于胞外液体补充(例如失血时),而5%葡萄糖溶液和糖水用于维持补液或者治疗脱水(表4)。当用0.9%盐水或者平衡盐溶液补充血容量时,输流量大致需要相当于3倍的失血量,因为只有约三分之一的液体留在血管内。大量输注0.9%盐水会导致高氯性代谢性酸中毒,这种酸中毒是否有害还不明确<sup>19-20</sup>。大量输注5%葡萄糖会导致严重的低钠血症,但是使用含有盐和糖的溶液(如0.18%或0.45%的氯化钠加入4%的葡萄糖中),将0.9%盐水或平衡溶液与5%葡萄糖一起输注,可以减少此问题的发生<sup>21</sup>。平衡溶液通常含有阴离子如乳酸根或醋酸根代替碳酸氢盐(不可溶于溶液中),因此大量输注可能导致代谢性碱中毒。

表3 血浆及常见晶体液的组成和渗透压\*

| 液体              | Na <sup>+</sup> | Cl <sup>-</sup> | K <sup>+</sup> | Mg <sup>2+</sup> | Ca <sup>2+</sup> | HCO <sup>3-</sup> | 葡萄糖  | 醋酸 | 葡糖酸盐 | 渗透压(mOsm/L) |
|-----------------|-----------------|-----------------|----------------|------------------|------------------|-------------------|------|----|------|-------------|
| 正常血浆            | 142             | 103             | 4.5            | 1.25             | 2.5              | 24                | 0.08 |    |      | 291         |
| 0.9%盐水          | 154             | 154             |                |                  |                  |                   |      |    |      | 308         |
| 5%葡萄糖           |                 |                 |                |                  |                  |                   | 5    |    |      | 278         |
| 0.18%盐水溶于4%葡萄糖  | 30              | 30              |                |                  |                  |                   | 4    |    |      | 284         |
| Plasma-Lyte 148 | 140             | 98              | 5              | 1.5              |                  |                   |      | 27 | 23   | 294         |
| Hartmann液       | 131             | 111             | 5              |                  | 2                | 29(乳酸)            |      |    |      | 278         |
| 乳酸林格液           | 130             | 109             | 4              |                  | 1.5              | 28(乳酸)            |      |    |      | 273         |

注:\*各组成组分单位均为mmol/L,除了葡萄糖单位为g/dl

表4 常见液体的临床使用适应证

| 液体                 | 可能适应证 |
|--------------------|-------|
| 0.9%盐水             | 复苏    |
| 平衡晶体液,如Hartmann液   | 复苏    |
| 5%葡萄糖              | 维持    |
| 糖盐液,如0.18%盐水配4%葡萄糖 | 维持    |
| 胶体                 | 复苏    |

### 静脉补液方案的制定和监测

使用静脉补液的目的在于为休克患者维持有效循环血量及重要器官灌注,为无法行肠内营养的患者保持正常的液体平衡。制定补液方案有时颇具挑战性,尤其是对于自身稳态维持功能受损的患者,如心肾功能不全、体液持续丢失的患者(如腹泻)。对于初级医师而言,补液原则可简单的用5R来总结:复苏(Resuscitation)、常规维持(Routine maintenance)、再分布(Redistribution)、替换丢失(Replacement)和再评估(Reassessment)(图2)。

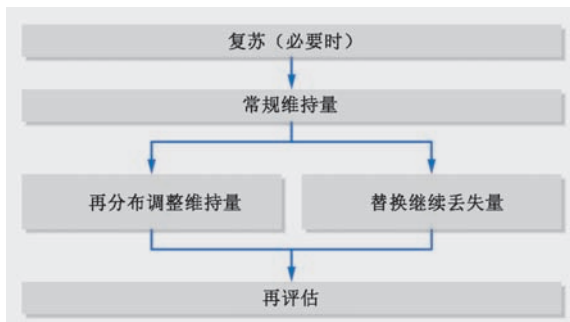

图2 制定补液方案时的5R原则

#### 复苏

如果患者处于休克状态且无心源性肺水肿的证据,在15分钟内予500 ml平衡盐溶液或0.9%盐水<sup>4,22</sup>。然后按照ABCDE路径对患者重新评估,如有必要可以继以快速静脉负荷量补充,最多2 000 ml<sup>23</sup>。如果患者仍处于休克状态,立刻请示上级医师指导治疗(病例分析2:第一部分)

#### 常规维持

如果肠内途径无法满足患者的日常需要量,就需要静脉补充。根据其他途径包括静脉药物摄入的液体量来调节补液量。框图1列出了正常条件下健康人群的维持需要量。对于肥胖患者,根据理想体重设计补液量[理想体重=(男)56.2 kg + 1.41 kg×(身高-1.5 m)/2.5 cm,或者(女)53.1 kg + 1.36 kg×(身高-1.5 m)/2.5 cm]。合适的维持液包括0.18%氯化钠溶液溶于4%葡萄糖再加钾,或者0.9%氯化钠溶液配2倍体积5%葡萄糖再加钾。

#### 再分布量

维持液体量需要将液体再分布量(第三间隙丢失)计算

### 病例分析2:第一部分

一位50岁男性患者,体重70 kg,因为消化道出血继发循环衰竭。既往有酒精性肝硬化伴中度腹水病史。平日他低盐饮食、每天服用螺内酯100 mg。化验结果示血红蛋白70 g/L(参考值135~180),钠135 mmol/L(133~146),钾3.5 mmol/L(3.5~5.3),尿素8 mmol/L(2.5~7.8),肌酐110 μmol/L(60~120),动脉乳酸2.5 mmol/L(0.5~1.6)。凝血检查正常。

问题2:你将使用什么液体进行补液?

### 病例分析2:第二部分

经过复苏,内镜提示食管静脉曲张并进行了套扎。病房护士通知你患者感到恶心,无法经口补液。体格检查时发现患者循环良好,有中度腹水及踝部水肿。尿量为60 ml/小时,复查血钠132 mmol/L(参考值133~146),钾3.9 mmol/L(3.5~5.3),尿素10 mmol/L(2.5~7.8),肌酐120 μmol/L(60~120)。因为担心影响曲张静脉的套扎治疗,你决定不放置胃管,护士请你制定静脉维持补液的方案。

问题3:下一步你将如何做?

### 病例分析2:第三部分

入院后4天,患者出现了严重腹泻,考虑与抗生素应用相关。患者的维持液都从肠内摄入,你考虑有肠吸收减少的可能。

问题4:下一步你将使用什么液体?

在内,这种情况多出现在心、肾、肝功能不全时,如腹水及水肿。通常而言,为了减少第三间隙液体量增加,维持液体量应当减少;但是在临床上往往因为患者口渴不透明而难以完全实现(病例分析2:第二部分)。没有并发症但有严重炎症如脓毒性休克或胰腺炎的患者,液体也会从循环中大量渗入组织间隙;对这些患者,尽管正平衡明显,仍然要大量补液以防多器官功能衰竭。

#### 替换再丢失

如果有持续液体丢失,维持液体量需要适当增加,如腹泻、呕吐、胃肠痿、急性肾衰竭多尿期、大量出汗时。这些液体丢失的量和其中离子含量常常无法精确计算,需要更仔细的检查,了解丢失体液的可能离子构成(框图1)、至少每日监测一次电解质变化(病例分析2:第三部分)。每天每处液体丢失可能达1~2 L,需要用平衡盐溶液来替换,同时按需补充镁和钾。

#### 再评估

密切的监测有助于预防补液时的不良事件,如液体过

## 病例分析答案

**问题 1:** 考虑到患者没有血容量不足的表现、液体入超、血化验结果正常,你向护士说明,少尿很可能是术后正常的生理反应,不需要紧急予补液负荷量。当然,术后少尿也不能排除急性肾损伤的可能,你仍需要在 2 小时后再次评估患者情况。

**问题 2:** 该患者需要进行复苏,所以予 0.9% 氯化钠溶液 500 ml 在 15 分钟内输入,接下来予以输血治疗以改善患者的毛细血管再充盈时间、心率、血压。经过 1 小时输注 3 个单位红细胞后,患者的血流动力学恢复了稳定。

**问题 3:** 你意识到这是一个复杂补液,有异常的液体再分布(腹水和水肿),所以你需要征询胃肠科大夫的会诊意见。会诊意见考虑肝硬化的患者稀释性低钠血症很常见,目前不需要维持补液。下一步需要继续严密监测体液状态,如果出现循环不稳的情况如心率增快、低血压或少尿时,再次请会诊讨论。

**问题 4:** 该患者有电解质大量丢失的风险,包括钠、钾、碳酸氢盐、氯。你决定予静脉输注 Hartmann 溶液(每天 1 L),因为它含有所有电解质(乳酸盐代替碳酸氢盐)。每日定期监测尿素、电解质(包括镁),及时发现还需要继续补充的电解质,如钾。每天至少要评估水电解质情况 2 次。

量、血容量不足、电解质紊乱等。不要下达隔日的补液处方,至少每日都要评估患者的液体状态。

关于作者(Contributors): PF is the sole contributor.

利益竞争(Competing interests): I have read and understood BMJ policy on declaration of interests and declare the following interests: none.

来源与同行评议(Provenance and peer review): Not commissioned; externally peer reviewed.

患者知情同意(Patient consent): The cases are hypothetical

## 参考文献

- 1 The UK foundation programme curriculum. 2012. [www.foundationprogramme.nhs.uk/pages/trainers/assessment-guidance/FPCurriculum2012](http://www.foundationprogramme.nhs.uk/pages/trainers/assessment-guidance/FPCurriculum2012).
- 2 National Confidential Enquiry into Perioperative Deaths. Extremes of age: the 1999 report of the National Confidential Enquiry into Perioperative Deaths. 1999. [www.Ncepod.org.uk/pdf/1999/99full.pdf](http://www.Ncepod.org.uk/pdf/1999/99full.pdf).
- 3 Arieff AI. Fatal postoperative pulmonary edema: pathogenesis and literature review. *Chest* 1999;115:1371-7.
- 4 National Institute for Health and Care Excellence. Intravenous fluid therapy for adults in hospital. (Clinical Guideline 174.) 2013. [www.nice.org.uk/CG174](http://www.nice.org.uk/CG174).
- 5 Woodcock TE, Woodcock TM. Revised Starling equation and the glycocalyx model of transvascular fluid exchange: an improved paradigm for prescribing intravenous fluid therapy. *Br J Anaesth* 2012;108:384-94.
- 6 Mehanna HM, Moledina J, Travis J. Refeeding syndrome: what it is, and how to prevent and treat it. *BMJ* 2008;336:1495-8.
- 7 Préau S, Saulnier F, Dewavrin F, Durocher A, Chagnon JL. Passive leg raising is predictive of fluid responsiveness in spontaneously breathing patients with severe sepsis or acute pancreatitis. *Crit Care Med* 2010;38:819-25.
- 8 Powell-Tuck J, Gosling P, Lobo DN, Allison SP, Carlson GL, Gore M, et al; on behalf of BAPEN Medical (a core group of BAPEN), the Association for Clinical Biochemistry, the Association of Surgeons of Great Britain and Ireland, the Society of Academic and Research Surgery, the Renal Association and the Intensive Care Society. British consensus guidelines on intravenous fluid therapy for adult surgical patients (GIFTASUP). *Published* 2008, revised 2011. [www.bapen.org.uk/pdfs/bapen\\_pubs/giftasup.pdf](http://www.bapen.org.uk/pdfs/bapen_pubs/giftasup.pdf).
- 9 Spasovski G, Vanholder R, Alolio B, Annane D, Ball S, Bichet D, et al. Clinical practice guideline on diagnosis and treatment of hyponatraemia. *Intensive Care Med* 2014;40:320-31.
- 10 Severs D, Hoorne EJ, Rookmaaker MB. A critical appraisal of intravenous fluids: from the physiological basis to clinical evidence. *Nephrol Dial Transplant* 2014; published online 23 Jan.
- 11 Verheij J, van Lingen A, Beishuizen A, Christiaans HM, de Jong JR, Girbes AR, et al. Cardiac response is greater for colloid than saline fluid loading after cardiac or vascular surgery. *Intensive Care Med* 2006;32:1030-8.
- 12 Hartog CS, Natanson C, Sun J, Klein HG, Reinhart K. Concerns over use of hydroxyethyl starch solutions. *BMJ* 2014;349:g5981.
- 13 Perner A, Haase N, Guttormsen AB, Tenhunen J, Klemenzson G, Åneman A, et al. Hydroxyethyl starch 130/0.42 versus Ringer's acetate in severe sepsis. *N Engl J Med* 2012;367:124-34.
- 14 Brunkhorst FM, Engel C, Bloos F, Meier-Hellmann A, Ragaller M, Weiler N, et al. Intensive insulin therapy and pentastarch resuscitation in severe sepsis. *N Engl J Med* 2008;358:125-39.
- 15 Myburgh JA, Finfer S, Bellomo R, Billot L, Cass A, Gattas D, et al. Hydroxyethyl starch or saline for fluid resuscitation in intensive care. *N Engl J Med* 2012;367:1901-11.
- 16 Perel P, Roberts I, Ker K. Colloids versus crystalloids for fluid resuscitation in critically ill patients. *Cochrane Database Syst Rev* 2013;2:CD000567.
- 17 Medicines and Healthcare Products Regulatory Agency. Hydroxyethyl starch intravenous infusion: suspension of licences. 2013. [www.mhra.gov.uk/Safetyinformation/DrugSafetyUpdate/CON286974](http://www.mhra.gov.uk/Safetyinformation/DrugSafetyUpdate/CON286974).
- 18 Caironi P, Tognoni G, Masson S, Fumagalli R, Pesenti A, Romero M, et al; ALBIOS Study Investigators. Albumin replacement in patients with severe sepsis or septic shock. *N Engl J Med* 2014;370:1412-21.
- 19 Handy JM, Soni N. Physiological effects of hyperchloraemia and acidosis. *Br J Anaesth* 2008;101:141-50.
- 20 Kaplan JK, Frangos S. Clinical review: acid-base abnormalities in the intensive care unit—part II. *Crit Care* 2005;9:198-203.
- 21 Reynolds RM, Padfield PL, Seckl JR. Disorders of sodium balance. *BMJ* 2006;332:702-5.
- 22 Myburgh JA, Mythen MG. Resuscitation fluids. *N Engl J Med* 2013;369:2462-3.
- 23 Frost PJ, Wise MP. Early management of acutely ill ward patients. *BMJ* 2012;345:43-7.

BMJ takes no responsibility for the accuracy of the translation from the published English language original and is not liable for any errors that may occur.
